# Supplementary material for: Phosphorylation barcodes direct biased chemokine signaling at CXCR3
Source: PubMed Central journal article supplement — bioRxiv. 2023 Mar 14:2023.03.14.532634. Preprint. [Version 1] doi: 10.1101/2023.03.14.532634 (PMC10055163; doi:10.1101/2023.03.14.532634), 2023-03-14
Supplement: media-1.pdf [file media-1.pdf]

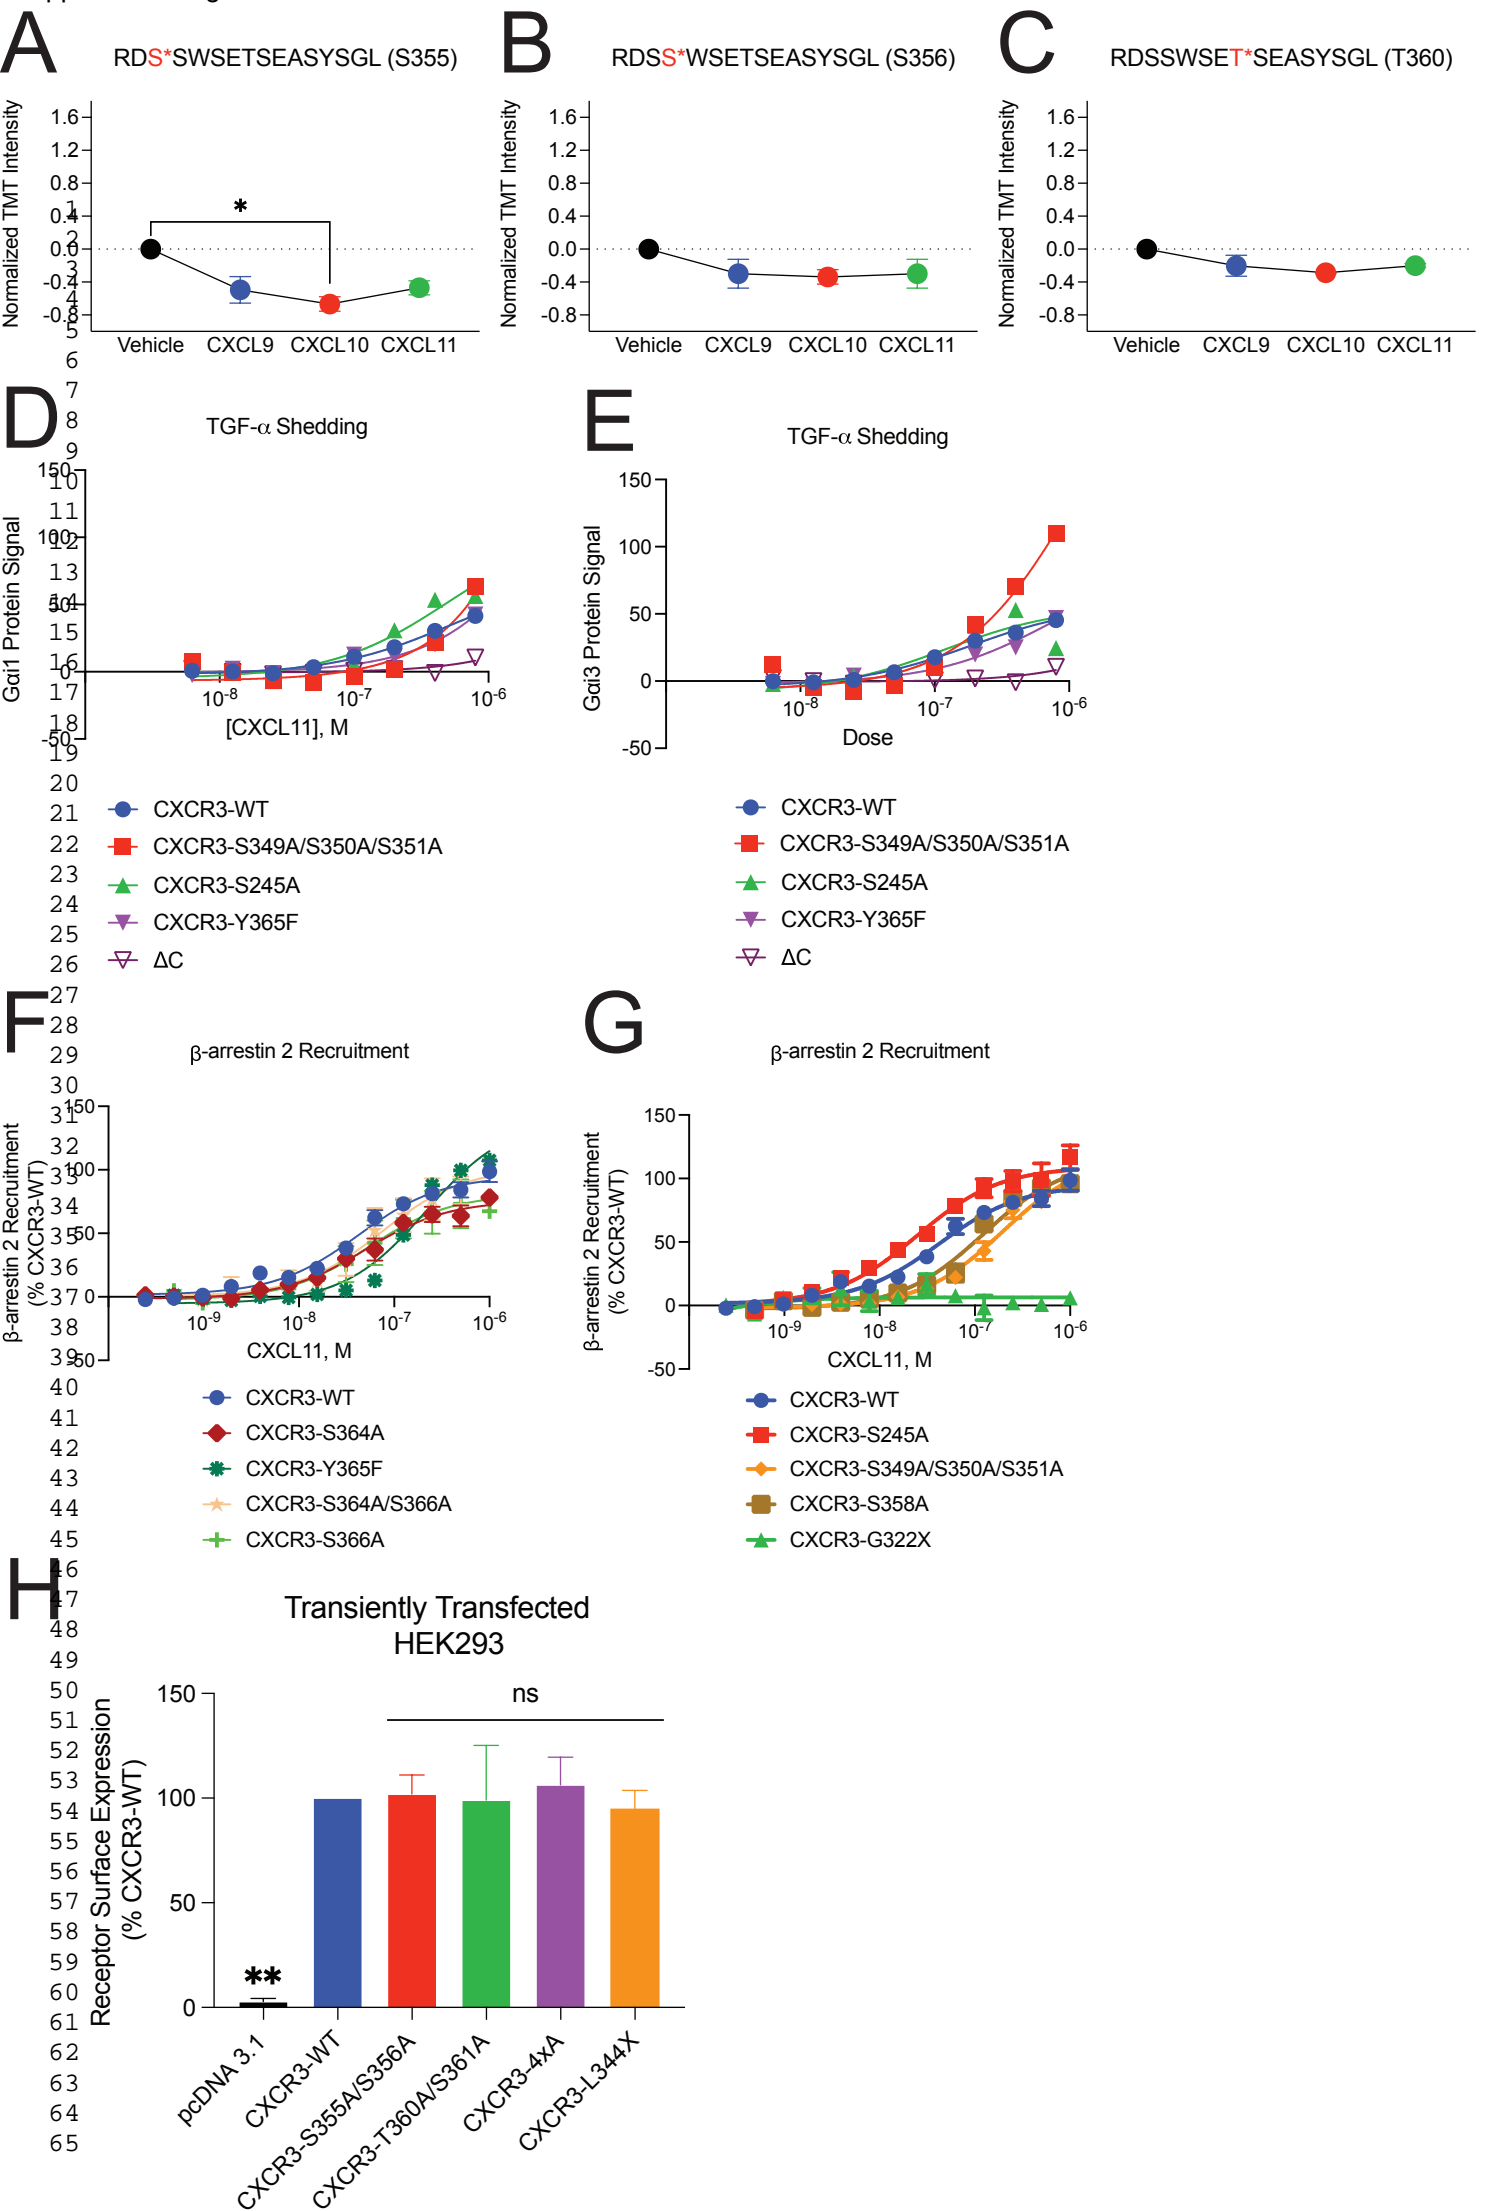

# G Protein Dissociation

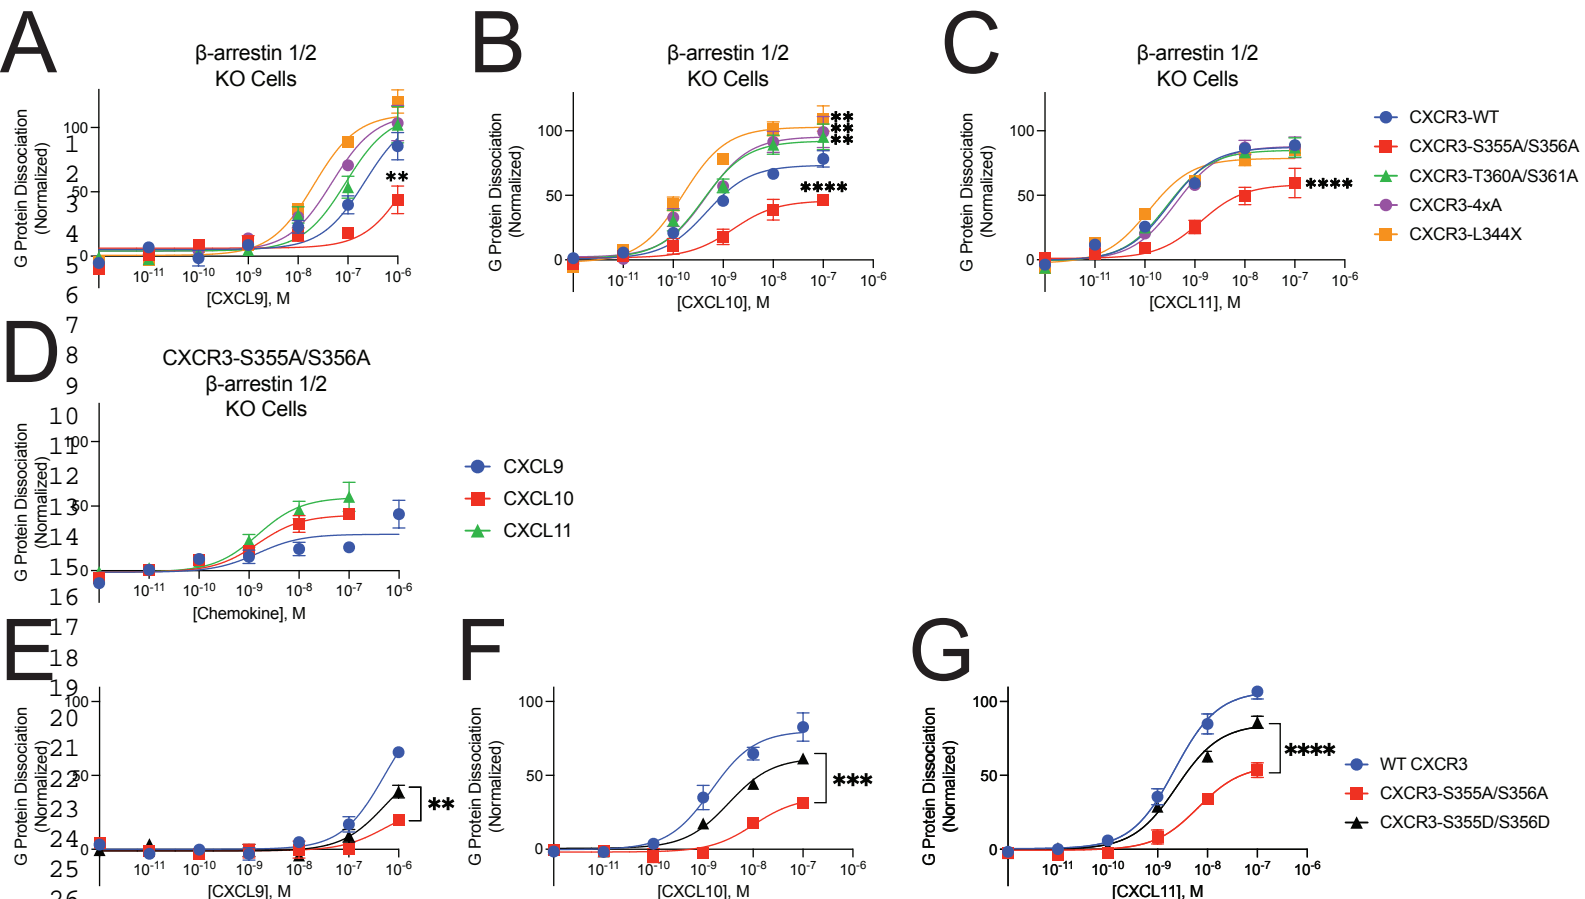

# $\beta$ -arrestin 2 Recruitment

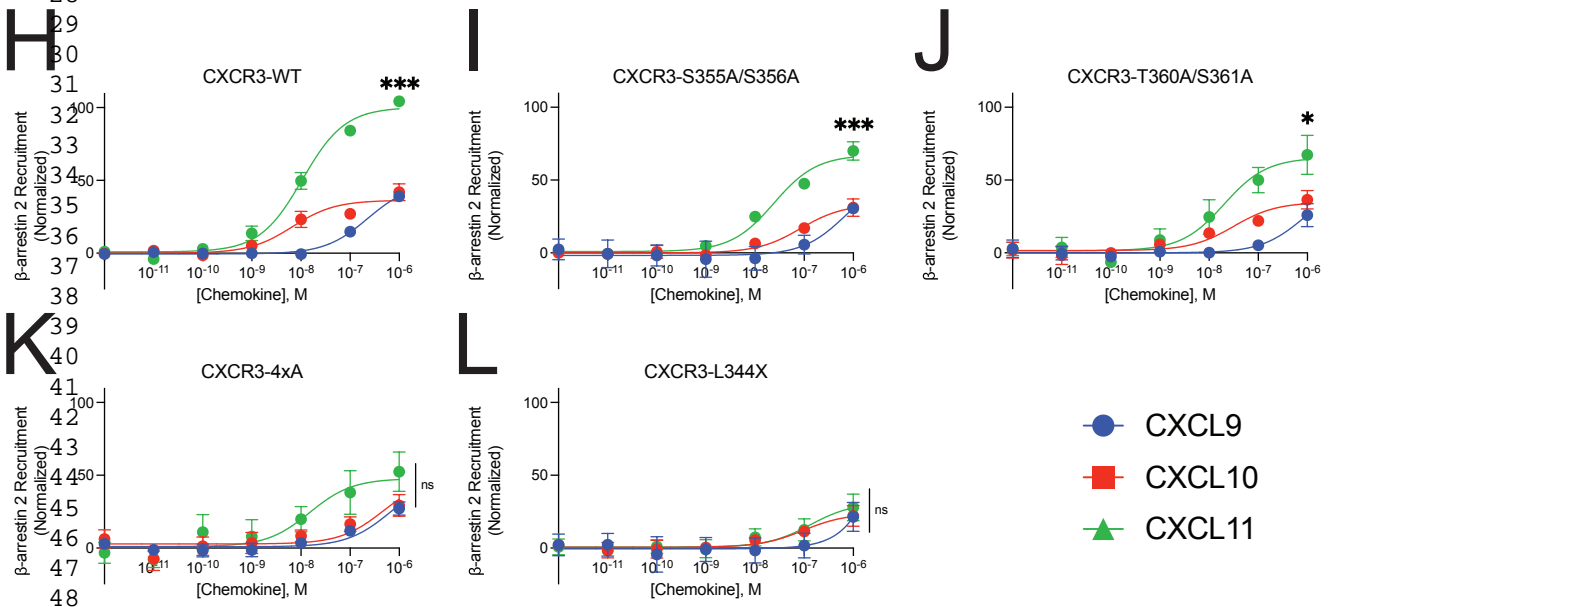

66  
67  
68  
69  
70  
71  
72  
73  
74  
75  
76  
77  
78  
79  
80  
81  
82  
83  
84  
85  
86  
87  
88  
89  
90  
91  
92  
93  
94  
95  
96  
97  
98  
99  
100

# Receptor Internalization

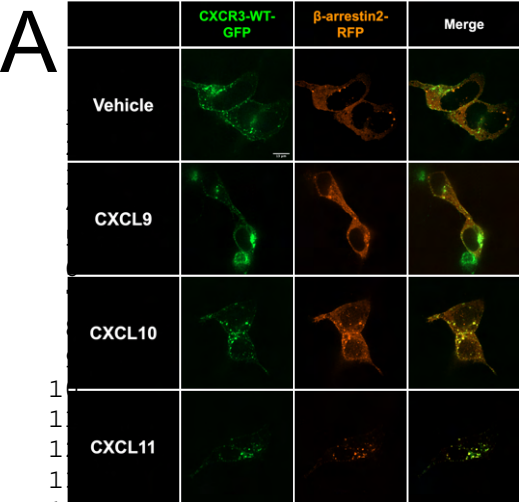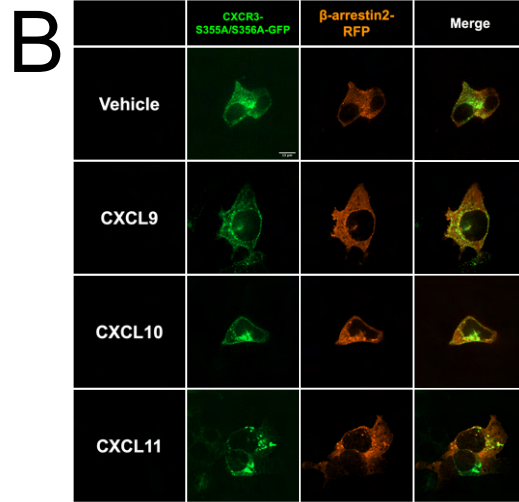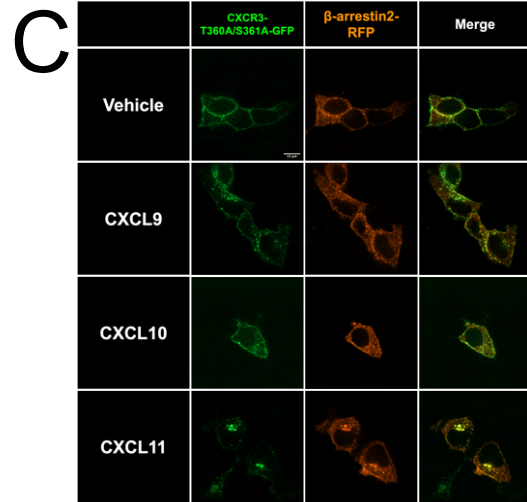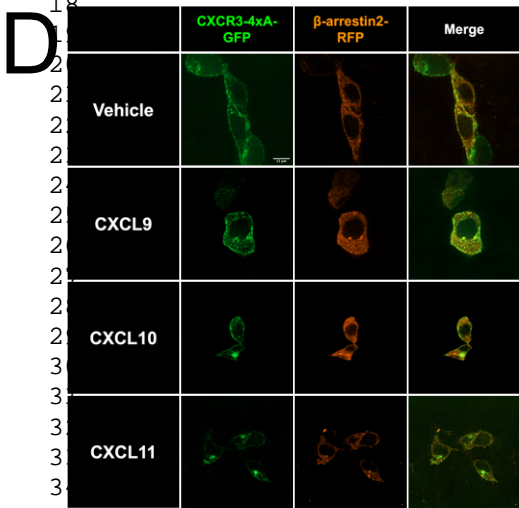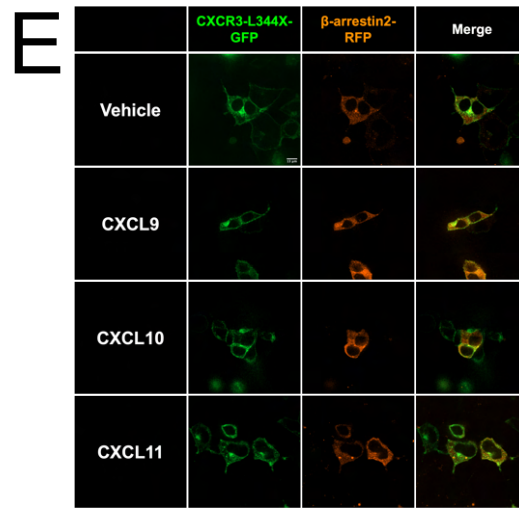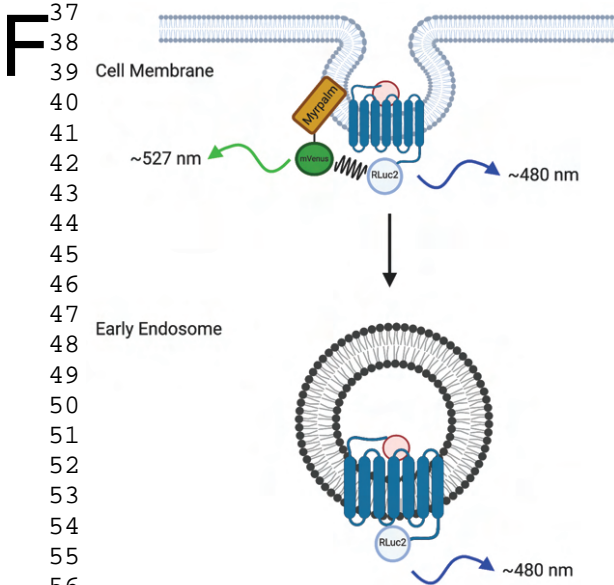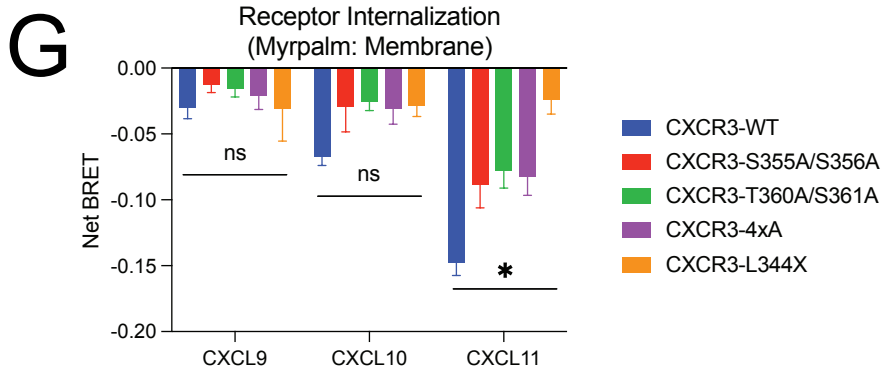

# GRK5 Recruitment

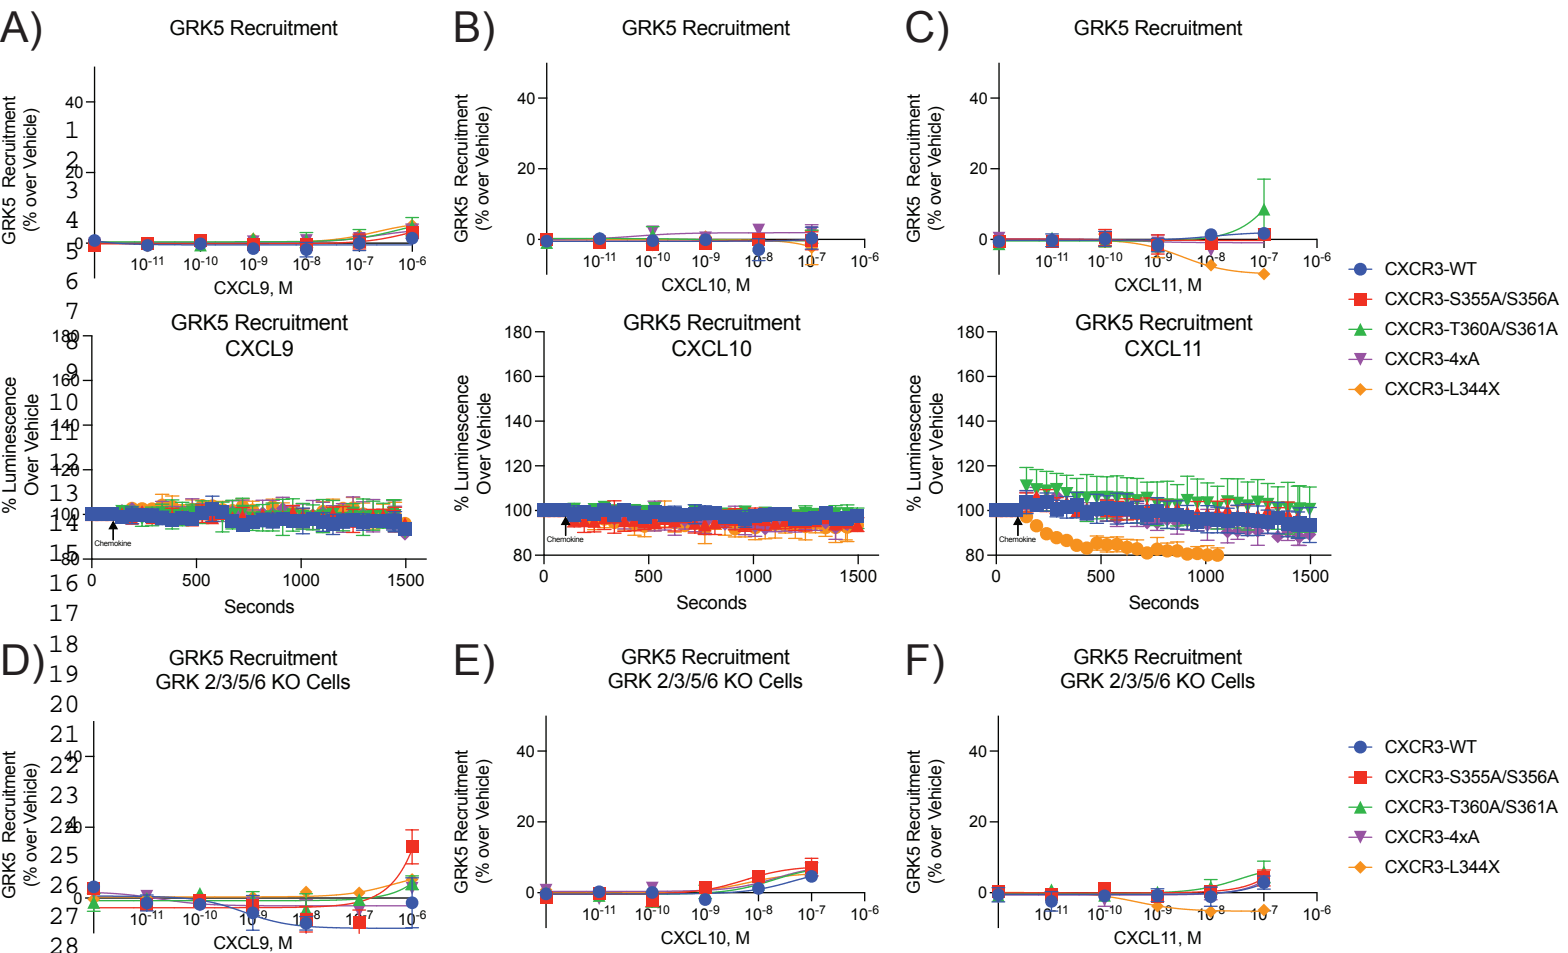

# GRK6 Recruitment

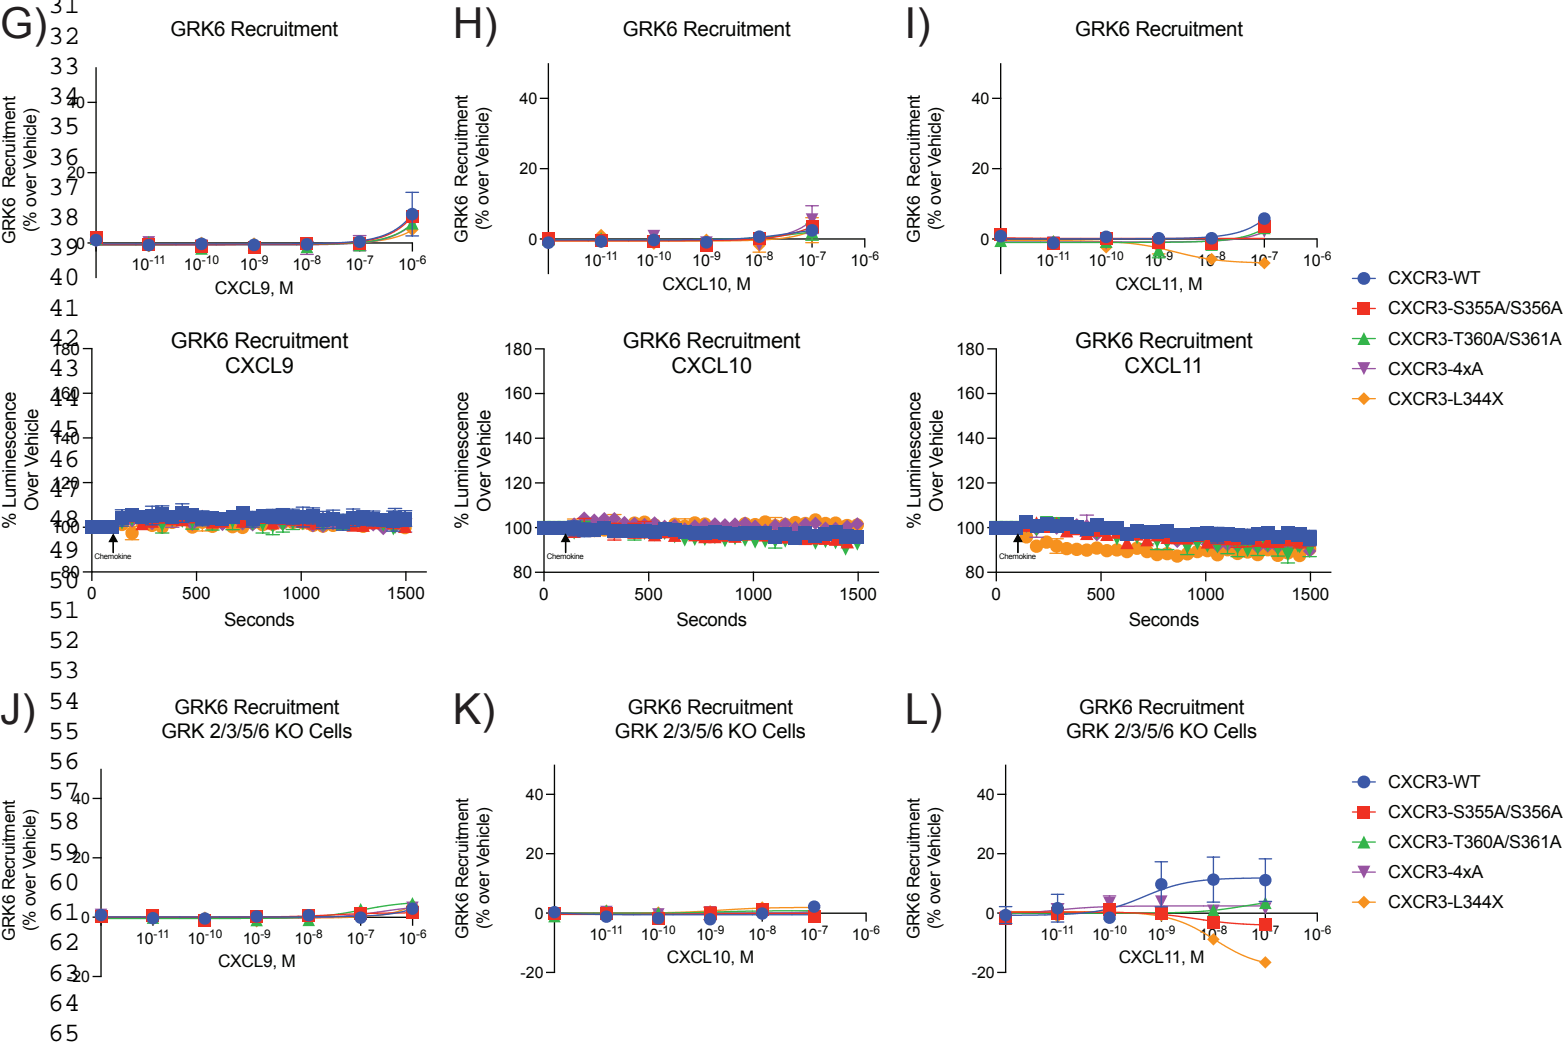

## GRK2 Recruitment

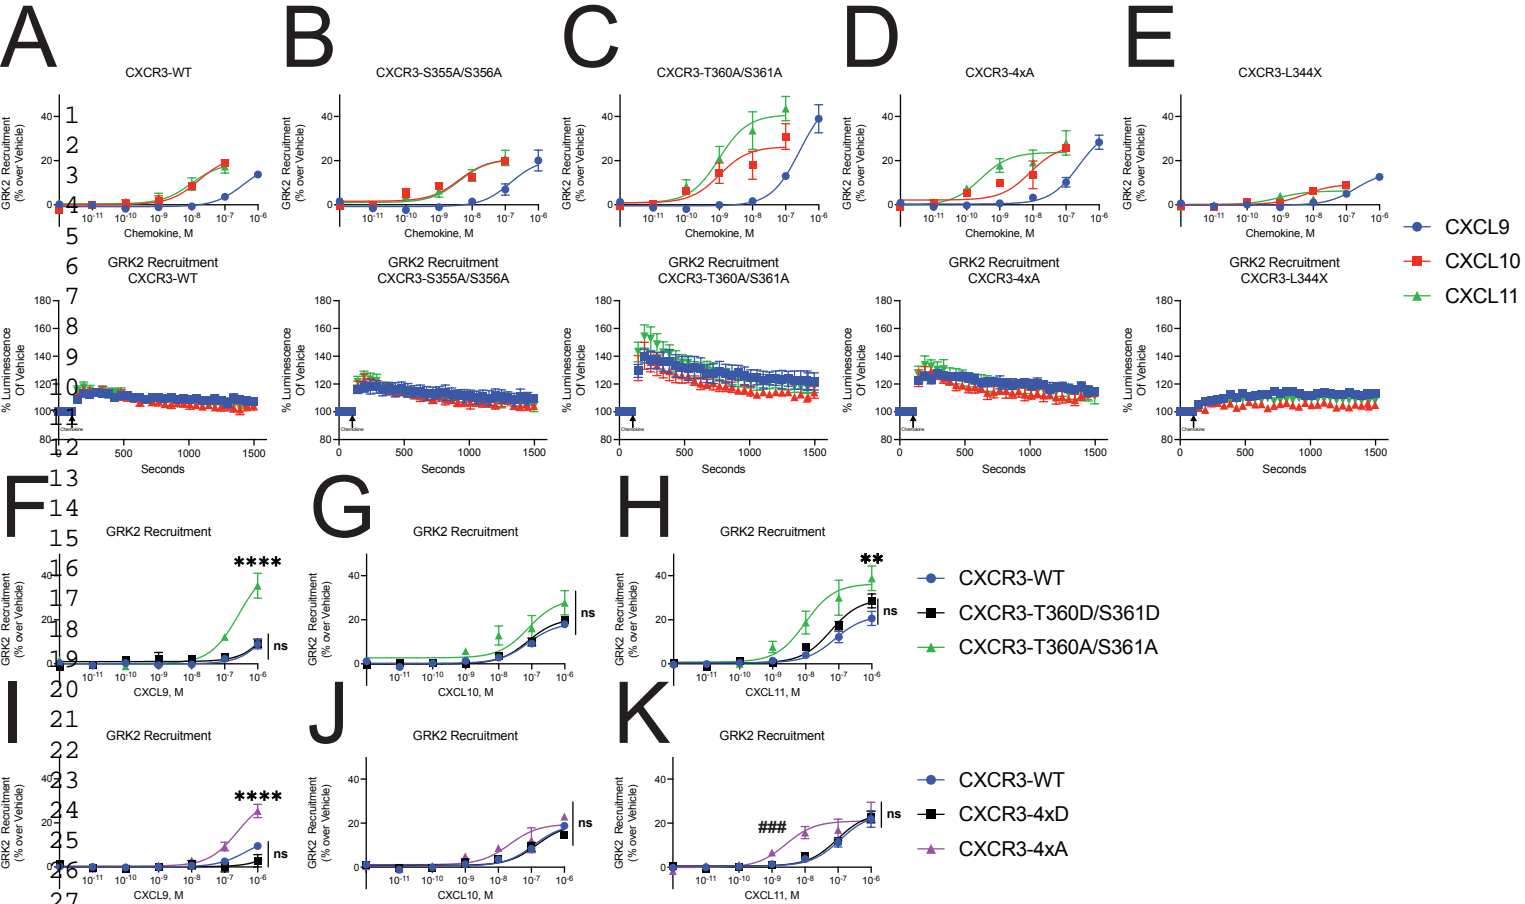

## GRK3 Recruitment

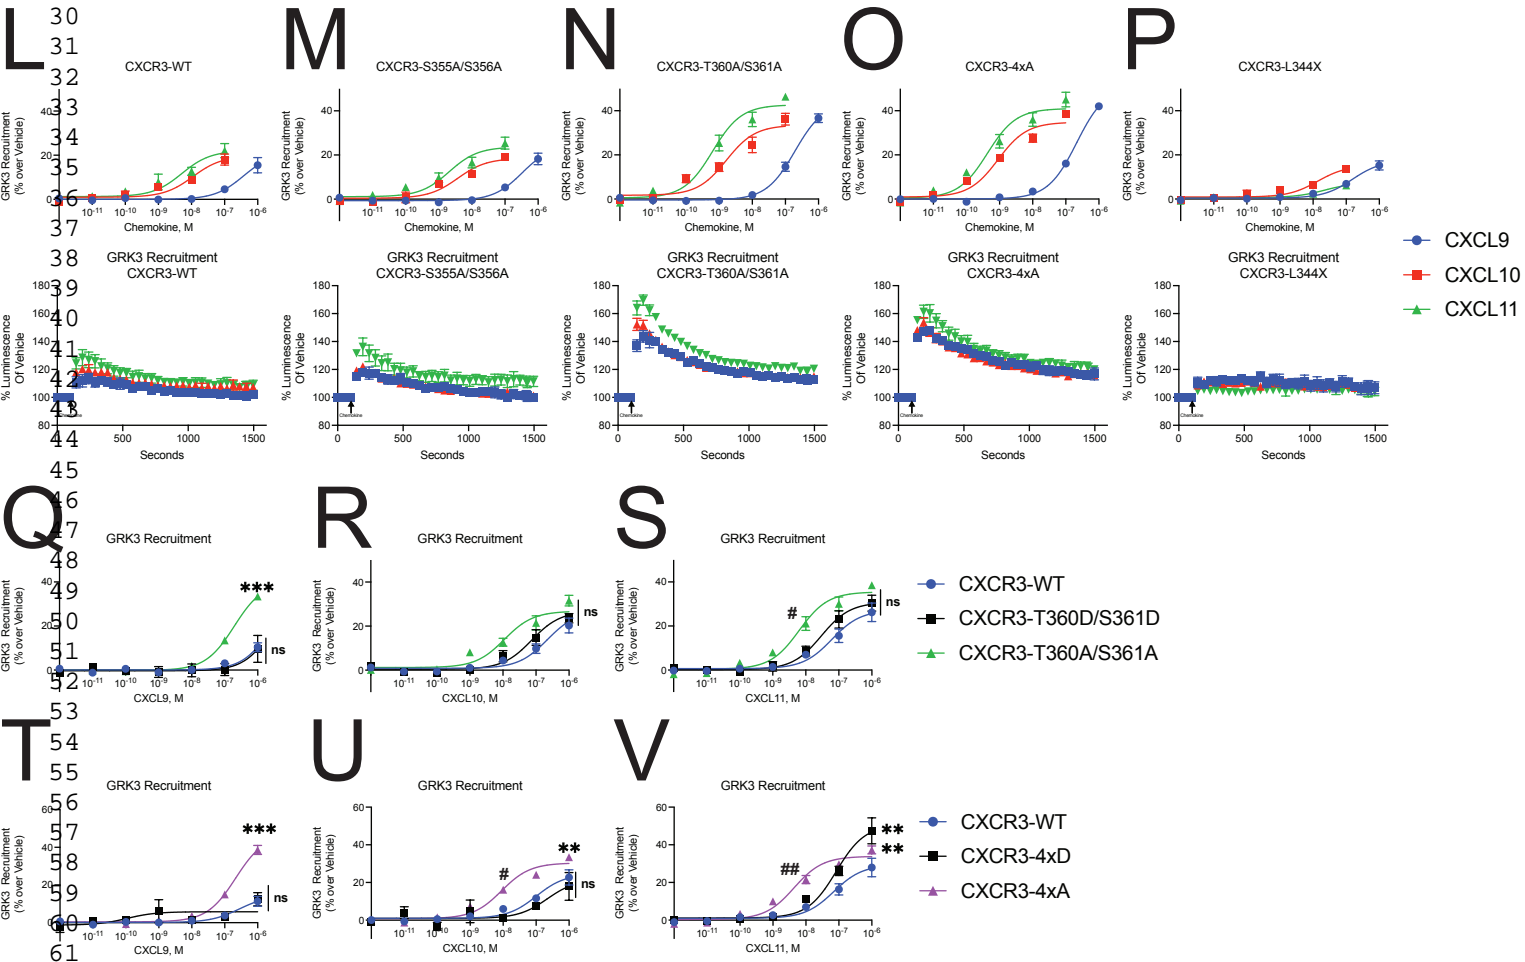

**SUPPLEMENTAL FIGURE 6**

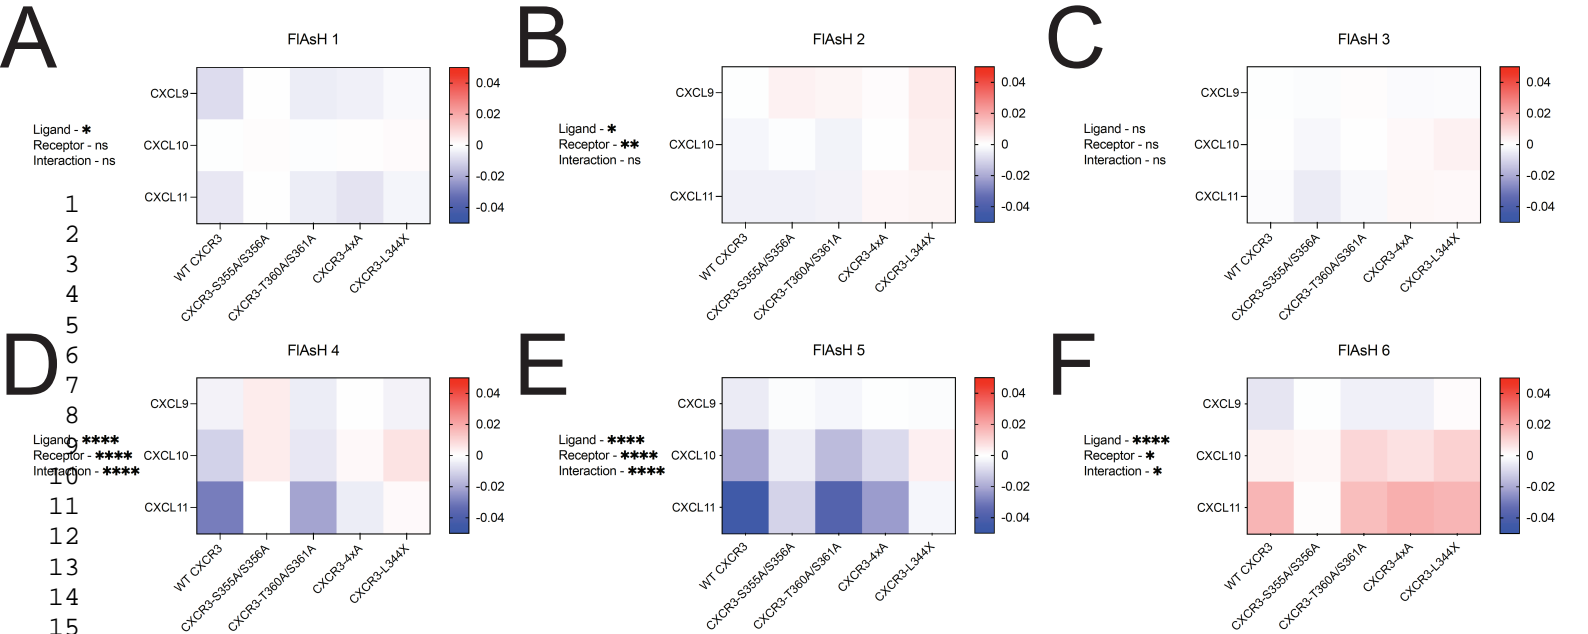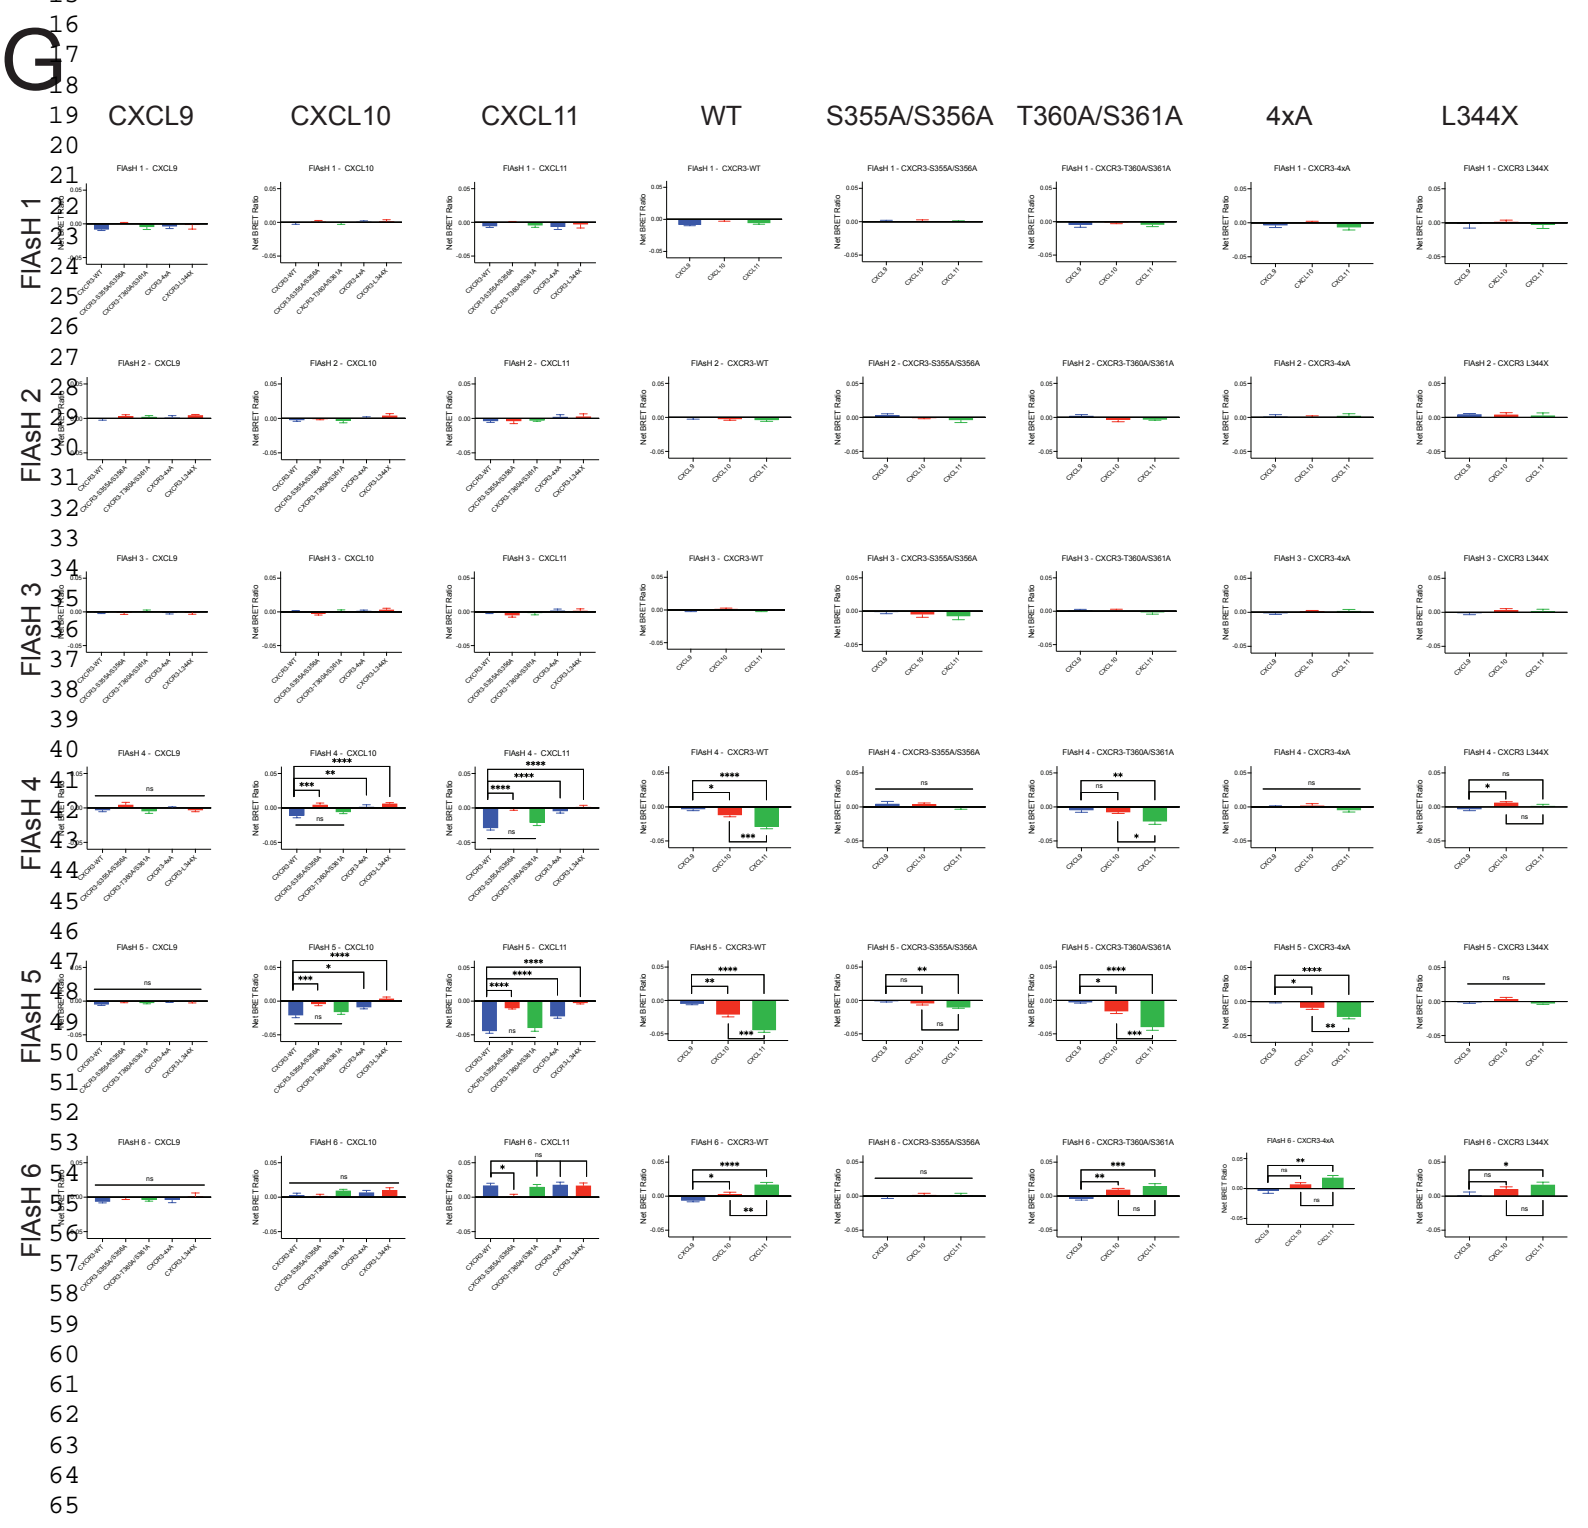

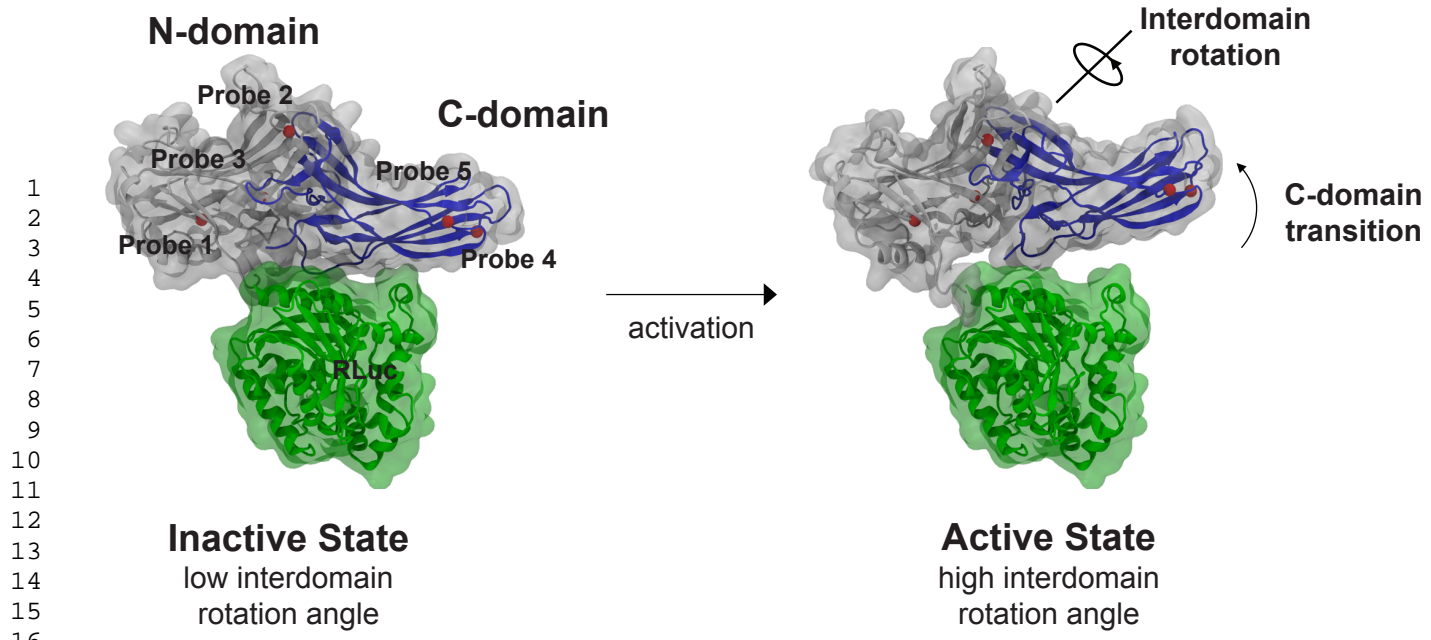

**A**

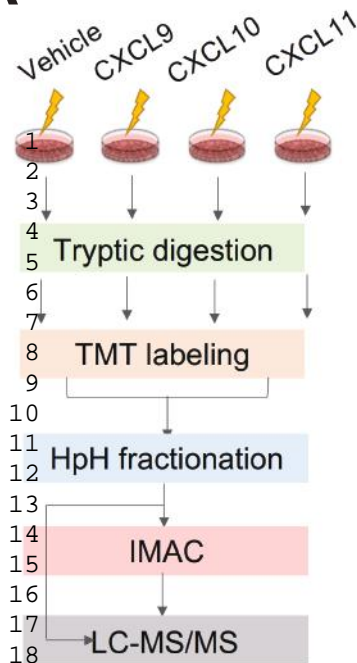

**B**

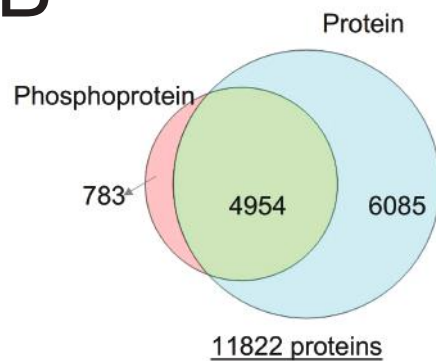

**C**

| Proteome                      |        |
|-------------------------------|--------|
| Total Peptides                | 159739 |
| Proteins                      | 11038  |
| Phosphoproteome               |        |
| Total Peptides                | 29992  |
| Phosphopeptides               | 26556  |
| Phosphorylation Sites         | 22620  |
| Phosphoproteins               | 5736   |
| Class 1 Phosphorylation Sites | 16448  |
| S                             | 18388  |
| T                             | 4112   |
| Y                             | 120    |

**E**

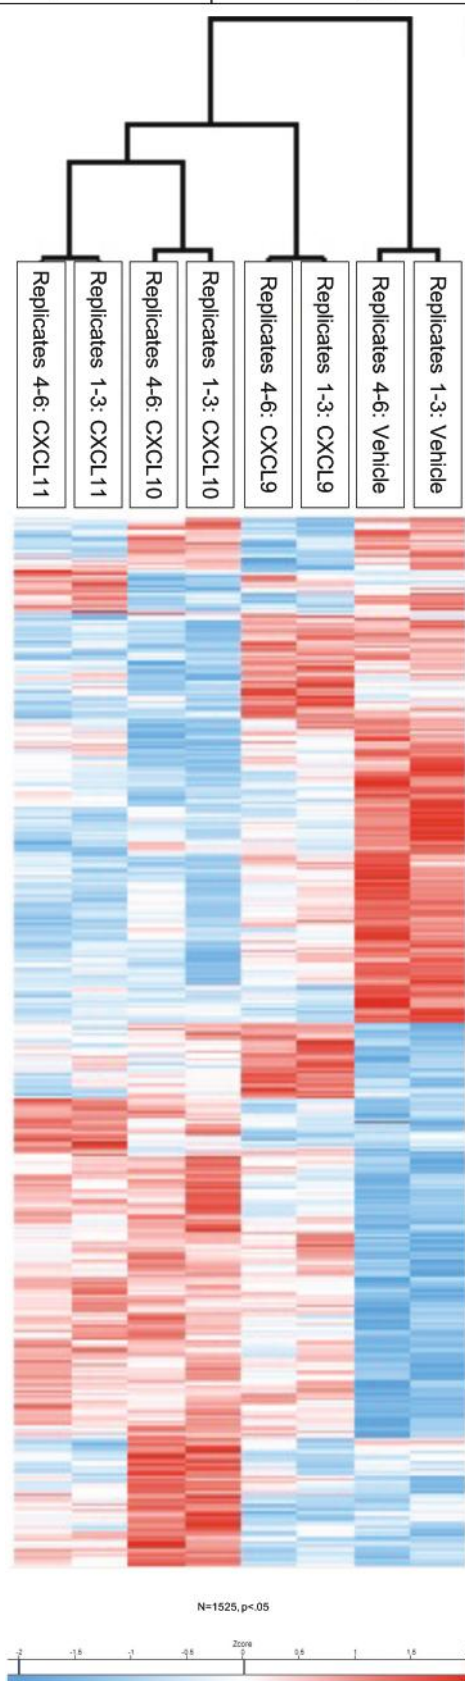

**D**

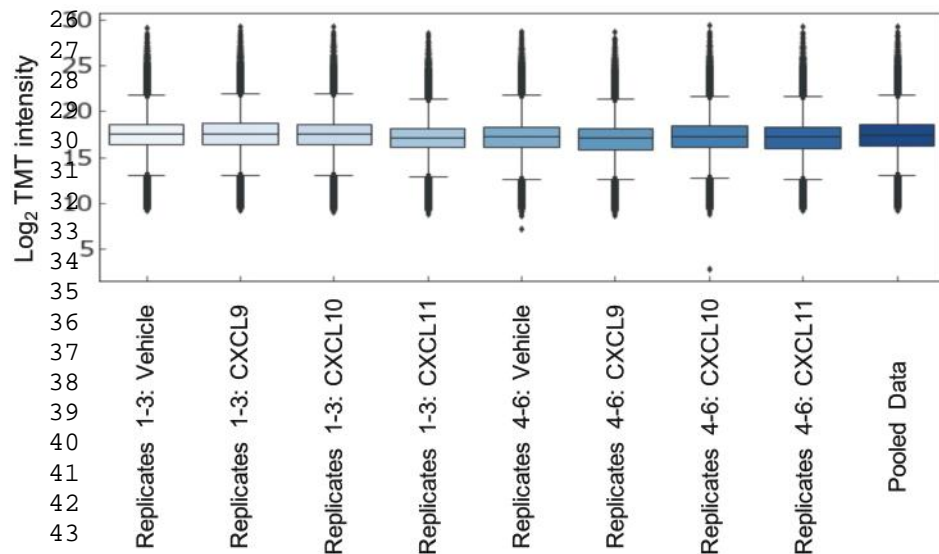

**F**

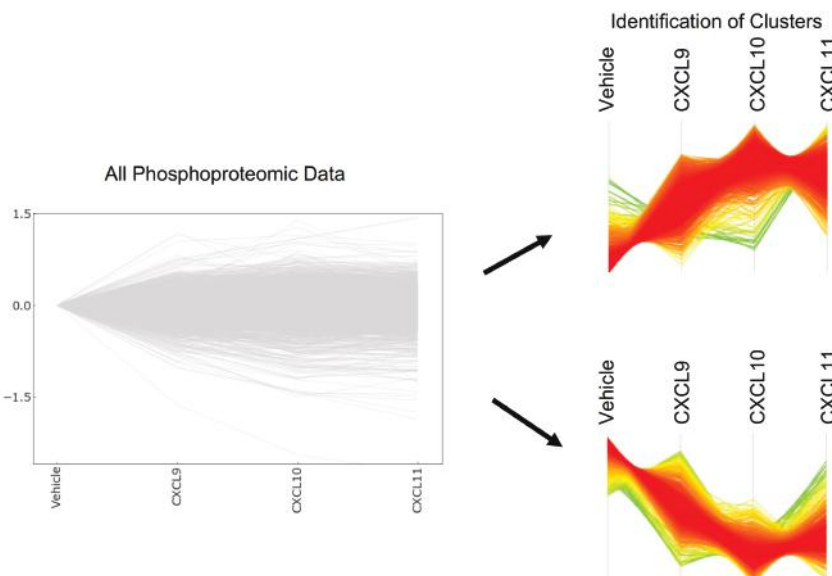



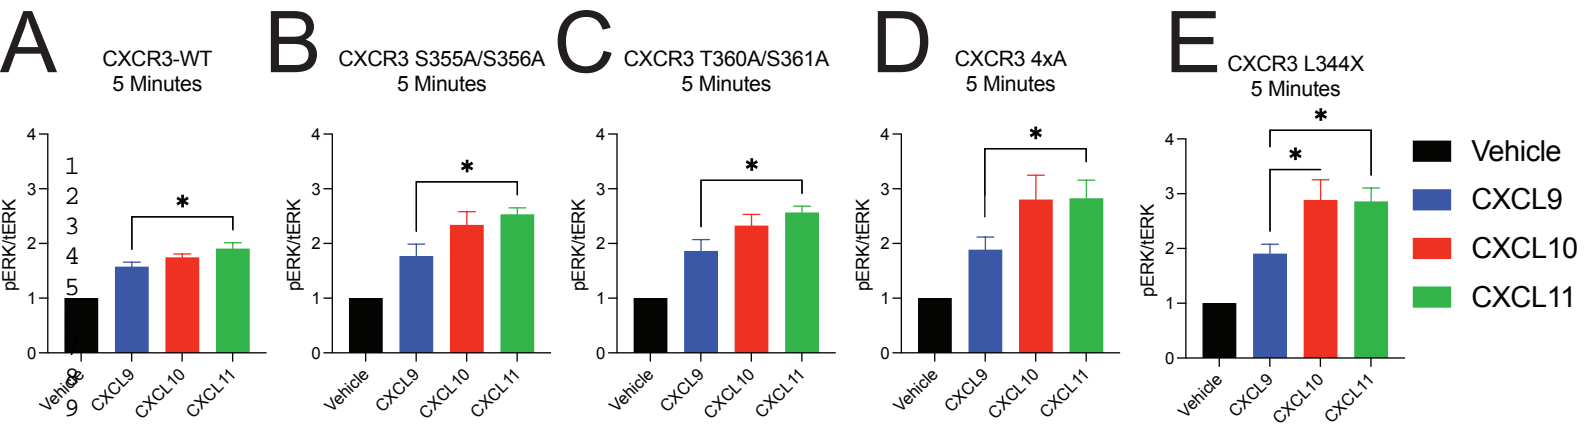

10  
11  
12  
13  
14  
15  
16  
17  
18  
19  
20  
21  
22  
23  
24  
25  
26  
27  
28  
29  
30  
31  
32  
33  
34  
35  
36  
37  
38  
39  
40  
41  
42  
43  
44  
45  
46  
47  
48  
49  
50  
51  
52  
53  
54  
55  
56  
57  
58  
59  
60  
61  
62  
63  
64  
65

**A**

CXCR3-KO

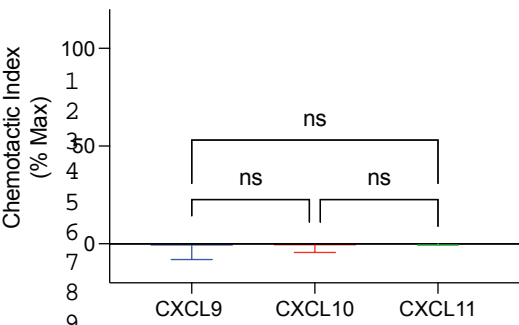

**B**

CXCR3-WT

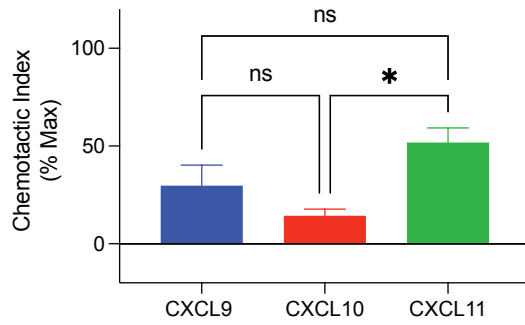

**C**

CXCR3-S355A/S356A

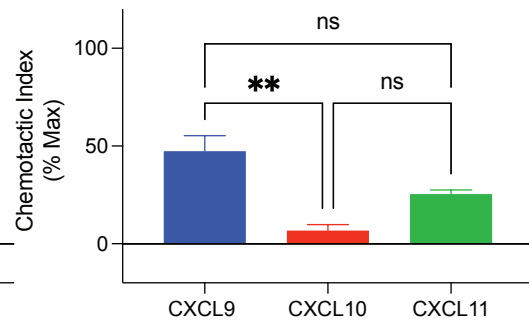

**D**

CXCR3-T360A/S361A

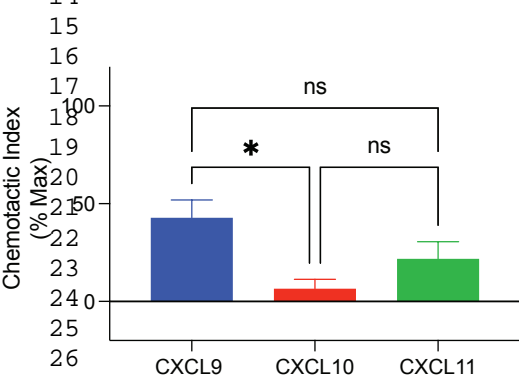

**E**

CXCR3-4xA

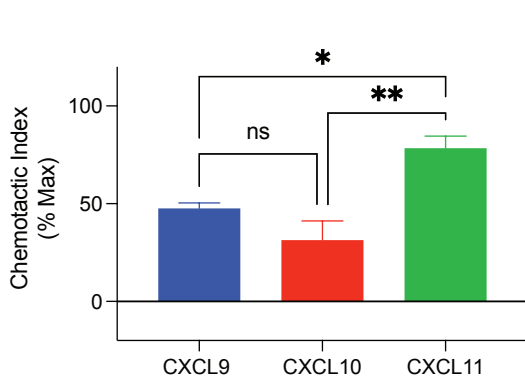

**F**

CXCR3-L344X

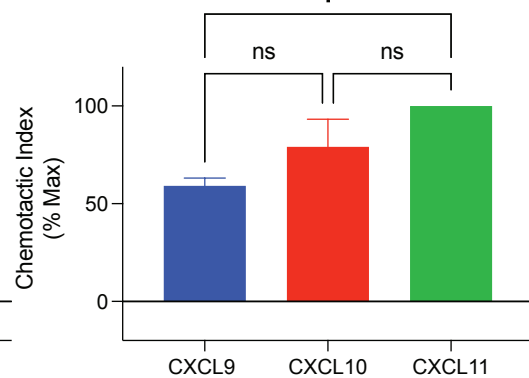

**G**

Chemotaxis vs. G Protein Activation

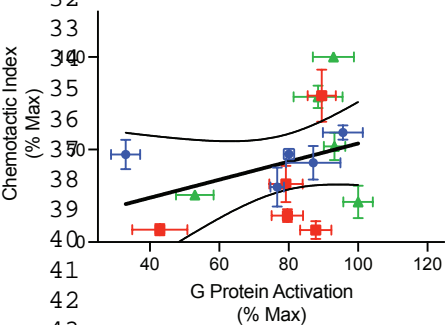

**H**

Chemotaxis vs.  $\beta$ -arrestin 2 Recruitment

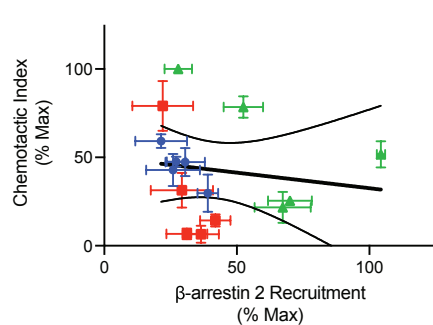

**I**

Chemotaxis vs. MAPK Activation\*

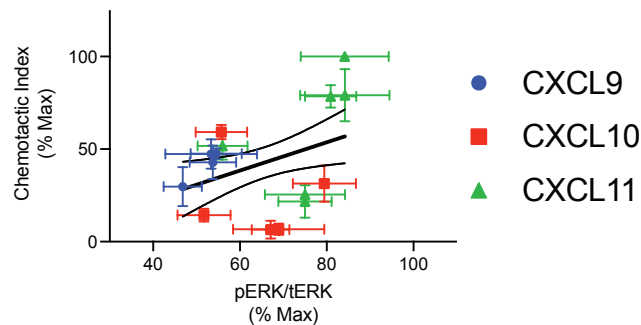

31  
32  
33  
34  
35  
36  
37  
38  
39  
40  
41  
42  
43  
44  
45  
46  
47  
48  
49  
50  
51  
52  
53  
54  
55  
56  
57  
58  
59  
60  
61  
62  
63  
64  
65
